# Supplementary material for: Artificial 3D hierarchical and isotropic porous polymeric materials
Source: PubMed Central journal article supplement — Sci Adv. 2018 May 11;4(5):eaat0713. doi: 10.1126/sciadv.aat0713 (PMC5947983; doi:10.1126/sciadv.aat0713), 2018-05-11
Supplement: aat0713_SM.pdf [file aat0713_SM.pdf]

## Supplementary Materials for **Artificial 3D hierarchical and isotropic porous polymeric materials**

Stefan Chisca, Valentina-Elena Musteata, Rachid Sougrat, Ali Reza Behzad, Suzana P. Nunes

Published 11 May 2018, *Sci. Adv.* **4**, eaat0713 (2018)

DOI: 10.1126/sciadv.aat0713

### This PDF file includes:

- Supplementary text on Flory-Huggins parameter estimation
- table S1. Flory-Huggins interaction parameters ( $\chi$ ) between copolymer blocks and the solvent mixture.
- fig. S1. Hierarchical structure of PS<sub>636</sub>-*b*-PtBA<sub>250</sub> films obtained after evaporation times varying from 10 to 30 s, before immersion in the nonsolvent bath.
- fig. S2. Hierarchical structure of PS<sub>636</sub>-*b*-PtBA<sub>250</sub> films after long evaporation times.
- fig. S3. Influence of the addition of  $\beta$ -CD to the PS<sub>636</sub>-*b*-PtBA<sub>250</sub>/DOX/DMF system on the macroscale.
- fig. S4. Influence of the addition of  $\beta$ -CD to the PS<sub>636</sub>-*b*-PtBA<sub>250</sub>/DOX/DMF system on the mesoscale.
- fig. S5. Mesopore dimensions of PS<sub>636</sub>-*b*-PtBA<sub>250</sub> films prepared from solutions in 1:3 (wt %) DOX/DMF.
- fig. S6. Effect of the relative humidity on the cross-section morphology of PS<sub>636</sub>-*b*-PtBA<sub>250</sub> films obtained from solutions in 1:3 (wt %) DOX/DMF, after 5-min evaporation.
- fig. S7. Hierarchical structure prepared from PS<sub>677</sub>-*b*-PtBA<sub>180</sub> dissolved in 1:3 (wt %) DOX/DMF.
- fig. S8. Hydrolysis of preformed hierarchical PS<sub>636</sub>-*b*-PtBA<sub>250</sub> films to PS-*b*-PAA.

## Supplementary text on Flory-Huggins parameter estimation

The Flory-Huggins interaction parameters ( $\chi$ ) between PS-*b*-PtBA and the solvent mixture were estimated from Hansen solubility values,  $\delta$ , values

$$\chi_{PS} = \frac{V A_{PS}}{RT} \quad (1)$$

where  $V$  is the solvent molar volume; and  $A$  was calculated from the weight average of the different  $\delta$  contributions

$$A_{PS} = (\delta_{DS} - \delta_{DP})^2 + 0.25(\delta_{PS} - \delta_{PP})^2 + 0.25(\delta_{HS} - \delta_{HP})^2 \quad (2)$$

where  $\delta_{iS}$  and  $\delta_{iP}$  are Hansen solubility parameters for the solvents and PS-*b*-PtBA, respectively.

**table S1. Flory-Huggins interaction parameters ( $\chi$ ) between copolymer blocks and the solvent mixture.**

|               | $\delta_D$<br>(MPa <sup>1/2</sup> ) | $\delta_P$<br>(MPa <sup>1/2</sup> ) | $\delta_H$<br>(MPa <sup>1/2</sup> ) | $\chi_{SPS}$ | $\chi_{SPtBA}$ |
|---------------|-------------------------------------|-------------------------------------|-------------------------------------|--------------|----------------|
| PS            | 18.5                                | 4.5                                 | 2.9                                 |              |                |
| PtBA          | 16                                  | 2.3                                 | 3.1                                 |              |                |
| THF:DMF (1:3) | 17.2                                | 11.6                                | 10.4                                | 0.90         | 1.16           |
| DOX:DMF (1:3) | 17.4                                | 10.9                                | 10.8                                | 0.86         | 1.13           |
| DMF           | 17.4                                | 13.7                                | 11.3                                | 1.25         | 1.60           |
| THF           | 16.8                                | 5.7                                 | 8                                   | 0.32         | 0.31           |
| DOX           | 17.5                                | 1.8                                 | 9                                   | 0.42         | 0.38           |

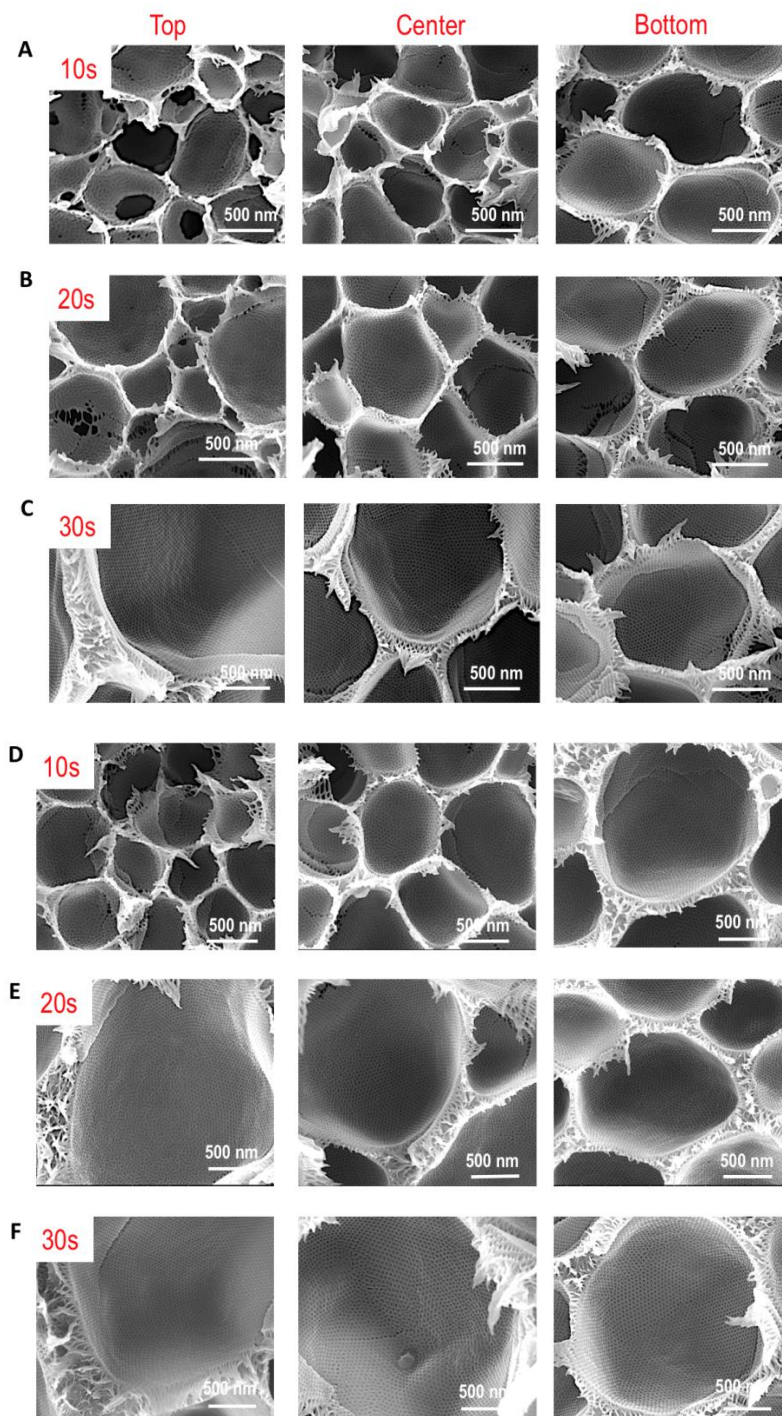

**fig. S1. Hierarchical structure of PS<sub>636</sub>-*b*-PtBA<sub>250</sub> films obtained after evaporation times varying from 10 to 30 s, before immersion in the nonsolvent bath. (A-C) Bulk SEM images of films obtained from 20 wt% block copolymer dissolved in 1:3 (wt%) THF/DMF; (D-E) analogous solutions with 6 wt%  $\beta$ -CD. Images are taken from different areas of the film (top, center, and bottom).**

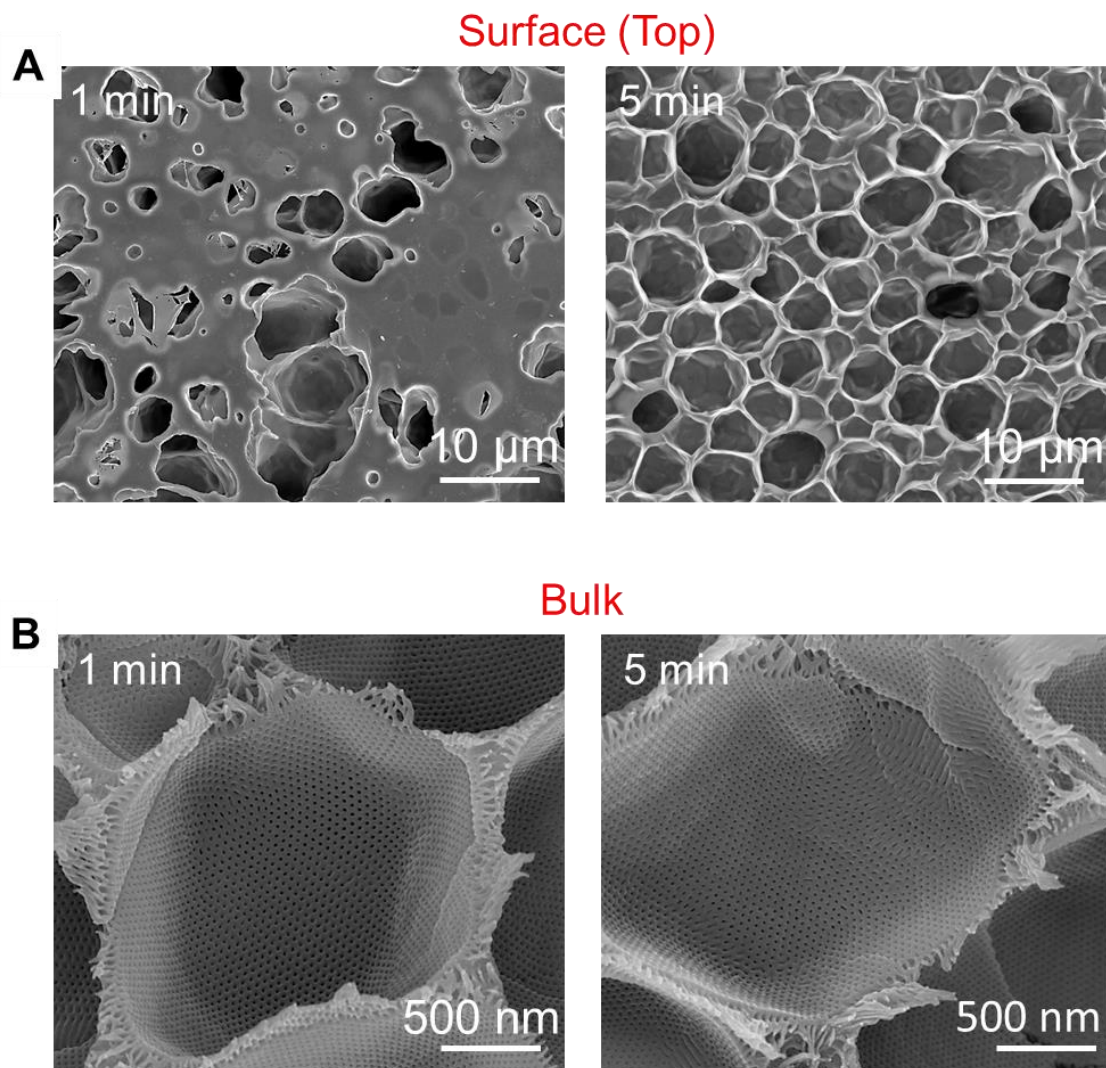

**fig. S2. Hierarchical structure of PS<sub>636</sub>-*b*-PtBA<sub>250</sub> films after long evaporation times. (A)** Surface and **(B)** bulk SEM images of films obtained from 20 wt% block copolymer dissolved in 1:3 (wt%) THF/DMF.

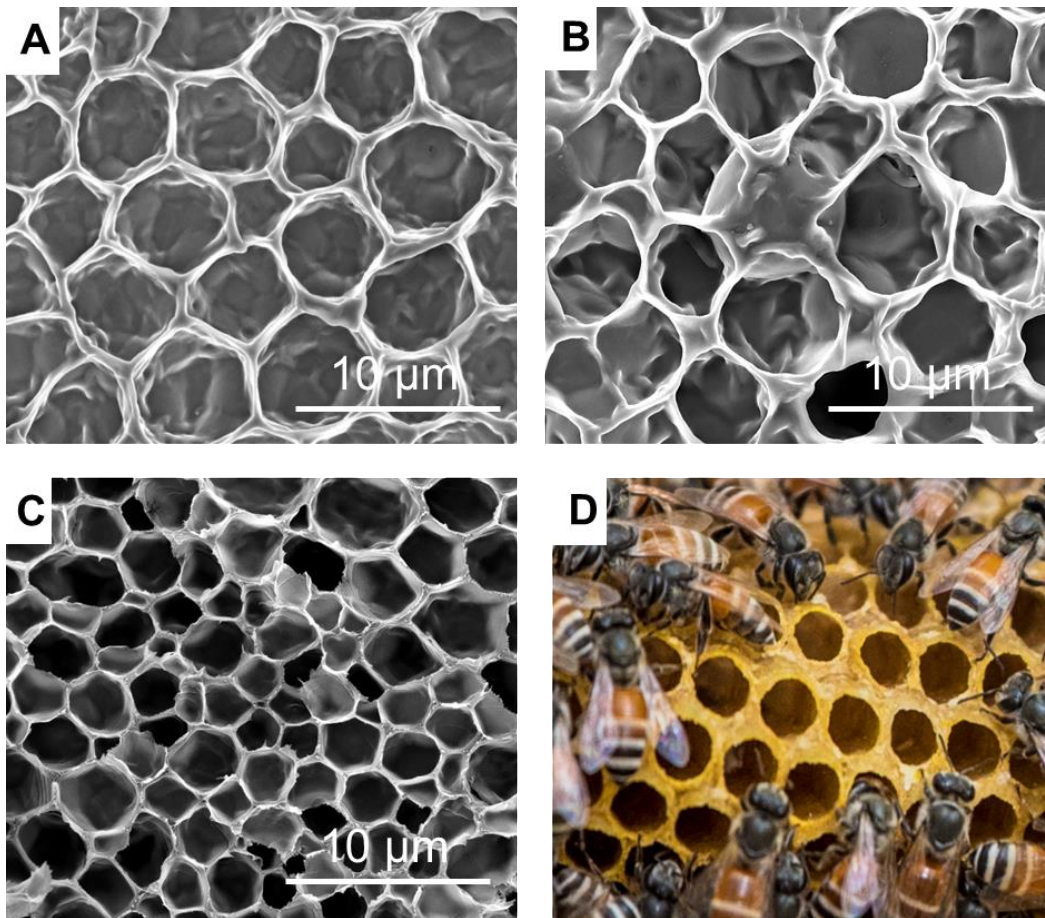

**fig. S3. Influence of the addition of  $\beta$ -CD to the  $\text{PS}_{636}\text{-}b\text{-PtBA}_{250}/\text{DOX}/\text{DMF}$  system on the macroscale. (A and B) Surface SEM images of the film obtained from (A) plain and (B) with 6 wt%  $\beta$ -CD solutions after 5 min evaporation. (C) Cross-section SEM image of the film obtained from plain solution. (D) Resembling a honeycomb architecture.**

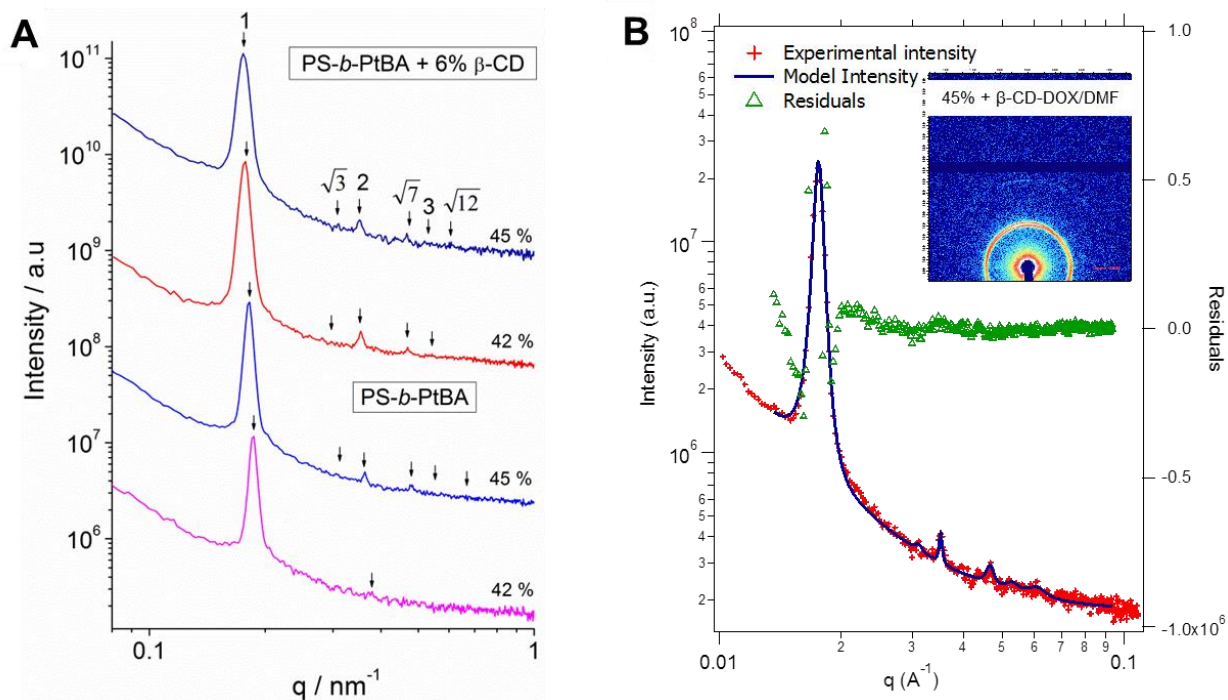

**fig. S4. Influence of the addition of β-CD to the PS<sub>636</sub>-*b*-PtBA<sub>250</sub>/DOX/DMF system on the mesoscale.** (A) SAXS patterns for 42 and 45 wt% PS<sub>636</sub>-*b*-PtBA<sub>250</sub> plain and with 6 wt% β-CD solutions. The peaks positions corresponding to *p6mm* symmetry are highlighted with arrows. (B) Scattering profile of *I* vs. *q* for 45 % + 6% β-CD in DOX/DMF and the corresponding 2D scattering profile (inset). The relative position of the peaks are  $q/q^* : 1, 1.77, 2.01, 2.66, 3.01, 3.48$ , very close to  $1, \sqrt{3}, \sqrt{4}, \sqrt{7}, \sqrt{9}, \sqrt{12}$  which are characteristic to hexagonally packed cylinders, with domain spacing  $d = 2\pi/q^*$  (where  $q^*=q_1$  and represents the first scattering peak position) of 35.82 nm.

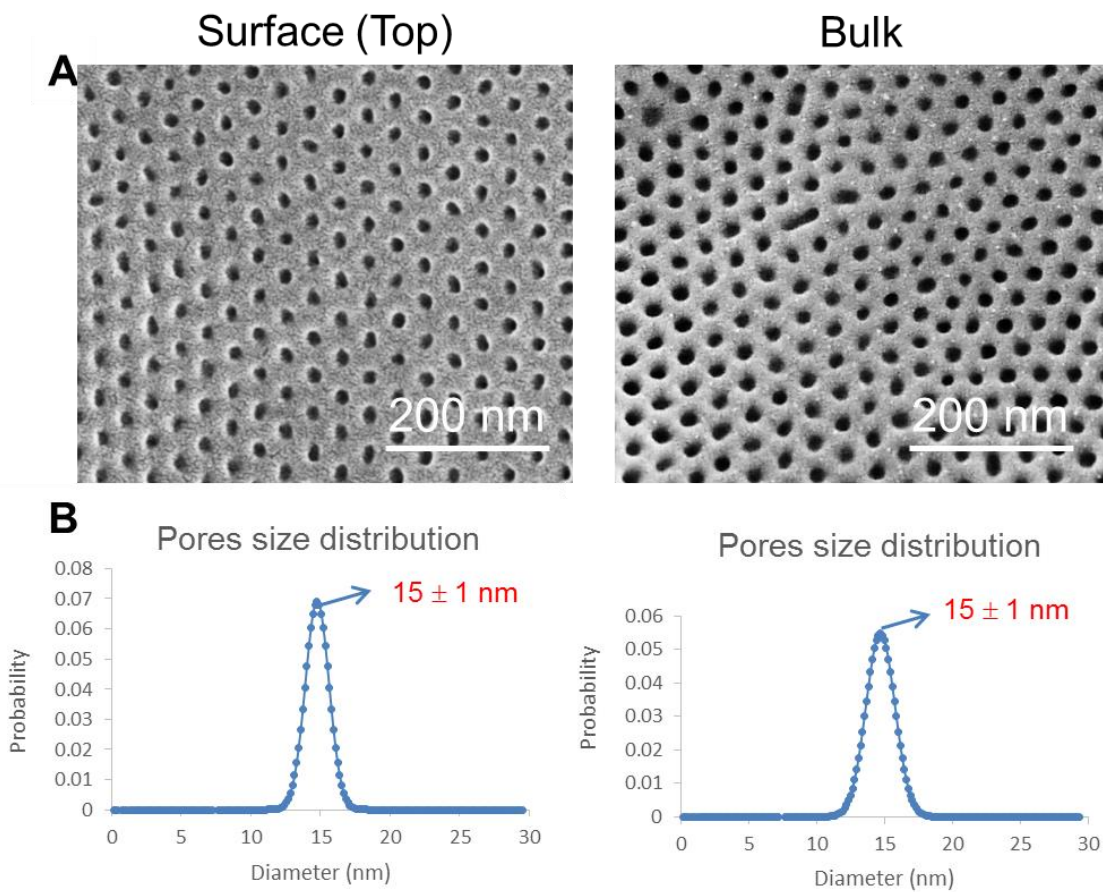

**fig. S5. Mesopore dimensions of PS<sub>636</sub>-*b*-PtBA<sub>250</sub> films prepared from solutions in 1:3 (wt %) DOX/DMF. (A) Surface (left) and bulk (right) SEM images of films obtained after 5 min evaporation. (B) Corresponding pore size distributions calculated from SEM images.**

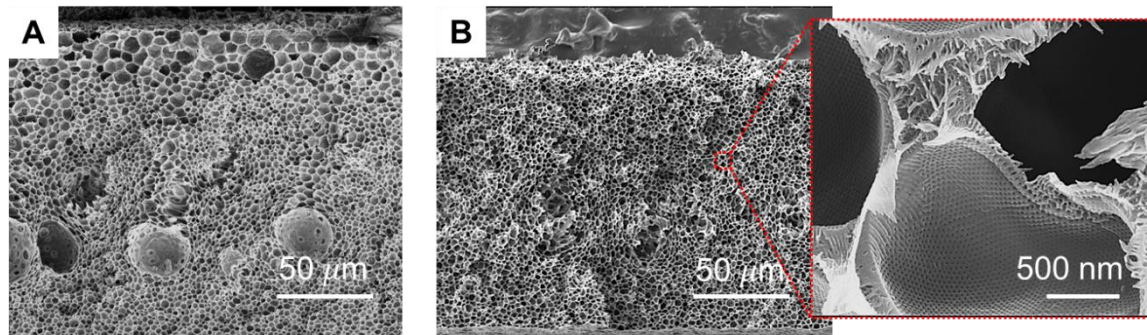

**fig. S6.** Effect of the relative humidity on the cross-section morphology of PS<sub>636</sub>-*b*-PtBA<sub>250</sub> films obtained from solutions in 1:3 (wt %) DOX/DMF, after 5-min evaporation. Cross-section morphology of PS<sub>636</sub>-*b*-PtBA<sub>250</sub> films obtained from solutions in 1:3 (wt%) DOX/DMF, after 5 min evaporation, under (A) 60% and (B) <20% relative humidity.

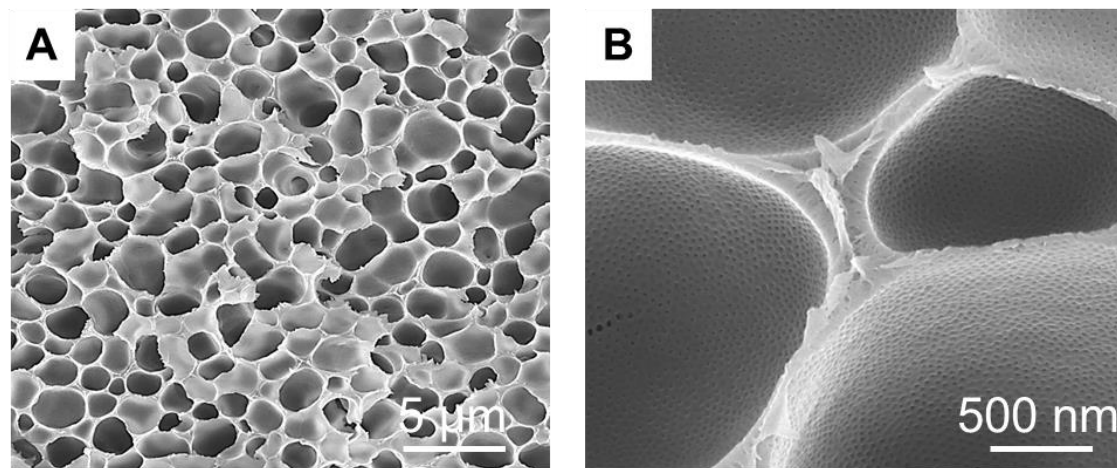

**fig. S7.** Hierarchical structure prepared from PS<sub>677</sub>-*b*-PtBA<sub>180</sub> dissolved in 1:3 (wt %) DOX/DMF. The films were obtained after 5 min evaporation.



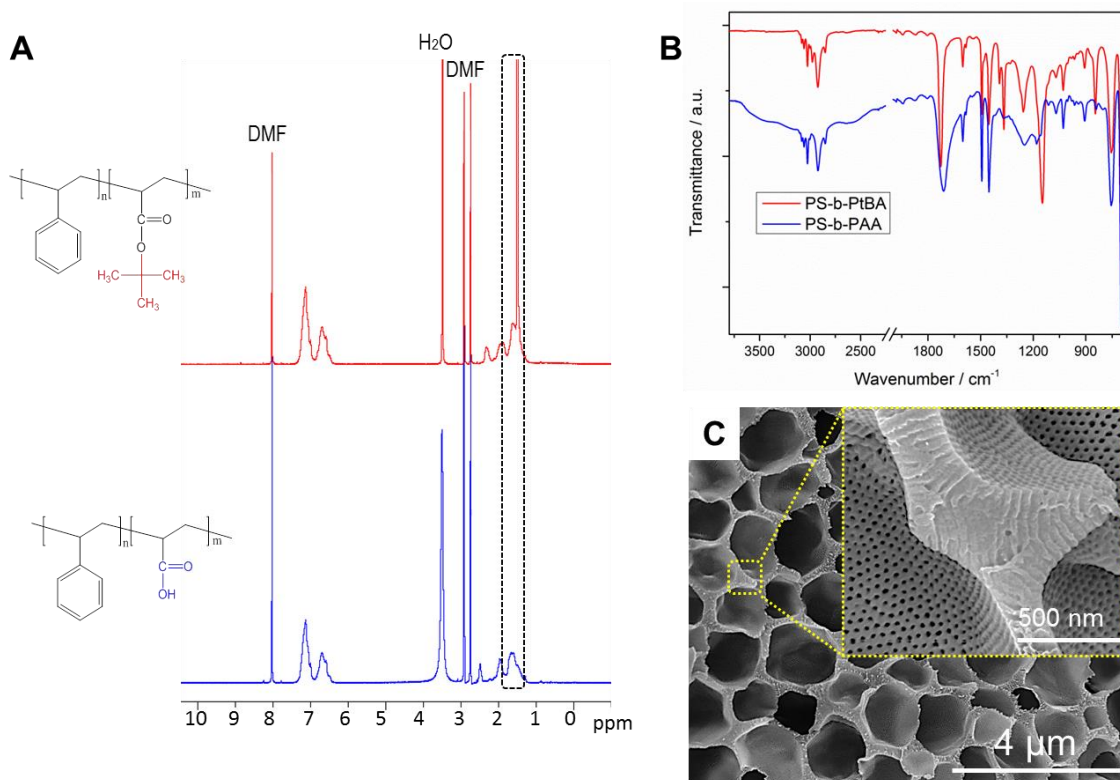

**fig. S8. Hydrolysis of preformed hierarchical PS<sub>636</sub>-*b*-PtBA<sub>250</sub> films to PS-*b*-PAA.** (A) H-NMR spectra for PS-*b*-PtBA and PS-*b*-PAA. The absence of characteristic peak at  $\delta = 1.45$  ppm, which corresponds to methyl protons from *tert*-butyl group, confirm that PtBA block was completely hydrolyzed into PAA. (B) FTIR spectra for PS-*b*-PtBA and PS-*b*-PAA. The presence of the broad peak at  $2500 - 3600 \text{ cm}^{-1}$  indicates the formation of carboxylic groups, as well as the shift of the C=O stretching band ( $1700 \text{ cm}^{-1}$  region) to a lower wavenumber. (C) SEM images of the film after hydrolysis which proves that hierarchical structure is maintained after modification.
